# Supplementary material
Source: PubMed Central journal article supplement (PMC5373933)
Supplement: NIHMS843023-supplement-01.pdf [file NIHMS843023-supplement-01.pdf]

**Supporting Information Table S1:** Mean differences in taste intensity ratings between women with and without self-reported taste-related risk factors

| Taste-Related Risk Factors | Taste Intensities <sup>a</sup> | Mean ± Standard Error of the Mean |            | P-value <sup>b</sup> |
|----------------------------|--------------------------------|-----------------------------------|------------|----------------------|
|                            |                                | Yes                               | No         |                      |
| Tonsillectomy              | 1 mM Quinine tongue-tip        | 18.14±1.14                        | 25.95±0.88 | 0.001                |
|                            | 1 M NaCl tongue-tip            | 22.22±1.42                        | 28.37±0.91 | 0.001                |
|                            | 1 mM Quinine Whole-mouth       | 48.65±1.96                        | 55.93±1.24 | 0.003                |
|                            | 1 M NaCl Whole-mouth           | 44.90±1.97                        | 48.58±1.15 | 0.11                 |
|                            | 0.32 M NaCl Whole-mouth        | 32.20±1.35                        | 36.78±0.86 | 0.007                |
| Multiple Ear Infections    | 1 mM Quinine tongue-tip        | 21.54±1.28                        | 26.72±0.88 | 0.003                |
|                            | 1 M NaCl tongue-tip            | 25.48±1.36                        | 28.91±0.95 | 0.05                 |
|                            | 1 mM Quinine Whole-mouth       | 50.43±1.82                        | 57.72±1.30 | 0.003                |
|                            | 1 M NaCl Whole-mouth           | 46.03±1.72                        | 50.28±1.22 | 0.06                 |
|                            | 0.32 M NaCl Whole-mouth        | 33.08±1.29                        | 38.24±0.89 | 0.002                |
| Head trauma                | 1 mM Quinine tongue-tip        | 24.77±1.54                        | 23.85±0.83 | 0.63                 |
|                            | 1 M NaCl tongue-tip            | 31.43±2.00                        | 25.86±0.83 | 0.006                |
|                            | 1 mM Quinine Whole-mouth       | 56.02±2.60                        | 53.72±1.17 | 0.41                 |
|                            | 1 M NaCl Whole-mouth           | 49.56±2.34                        | 47.25±1.10 | 0.37                 |
|                            | 0.32 M NaCl Whole-mouth        | 33.71±1.73                        | 36.05±0.81 | 0.22                 |

<sup>a</sup> Adjectival descriptors shown on the general Labeled Magnitude Scale (gLMS): ‘barely detectable’ (1.4), ‘weak’ (6), ‘moderate’ (17), ‘strong’ (34) and ‘very strong’ (53).

<sup>b</sup> Two-sided *P*-values for independent t-tests.

Abbreviations: gLMS, general Labeled Magnitude Scale.
